# Supplementary material for: Comprehensive evaluation of genome-wide 5-hydroxymethylcytosine profiling approaches in human DNA
Source: PubMed Central journal article supplement (PMC5397694; doi:10.1186/s13072-017-0123-7), 2017-04-20

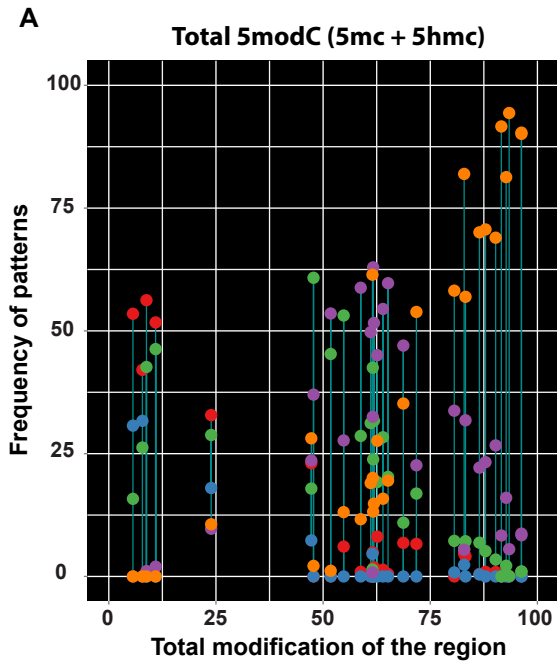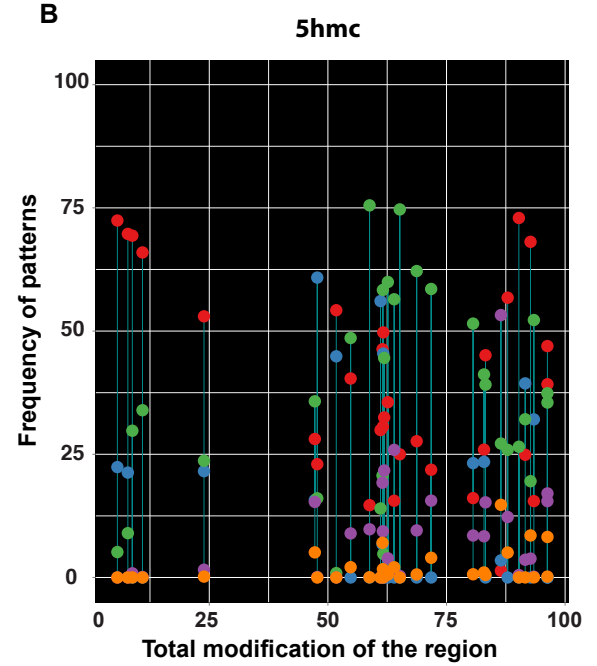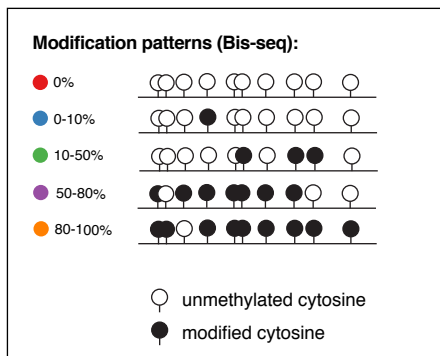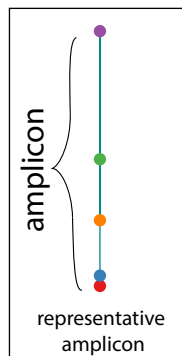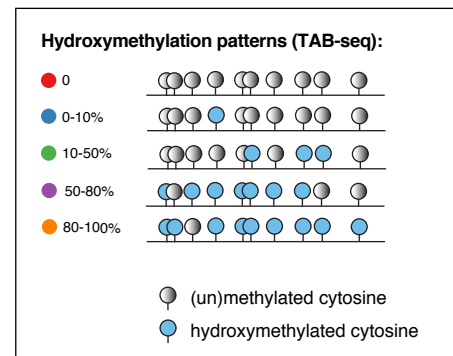

Supplement: 13072_2017_123_MOESM4_ESM.pdf [file 13072_2017_123_MOESM4_ESM.pdf]
